# Supplementary figures and images for: Impact of Physical Activity on Disability Risk in Elderly Patients Hospitalized for Mild Acute Diverticulitis and Diverticular Bleeding Undergone Conservative Management
Source: MDPI journal article supplement (doi:10.3390/medicina57040360), 2021-04-08

## FLUX DIAGRAM STROBE

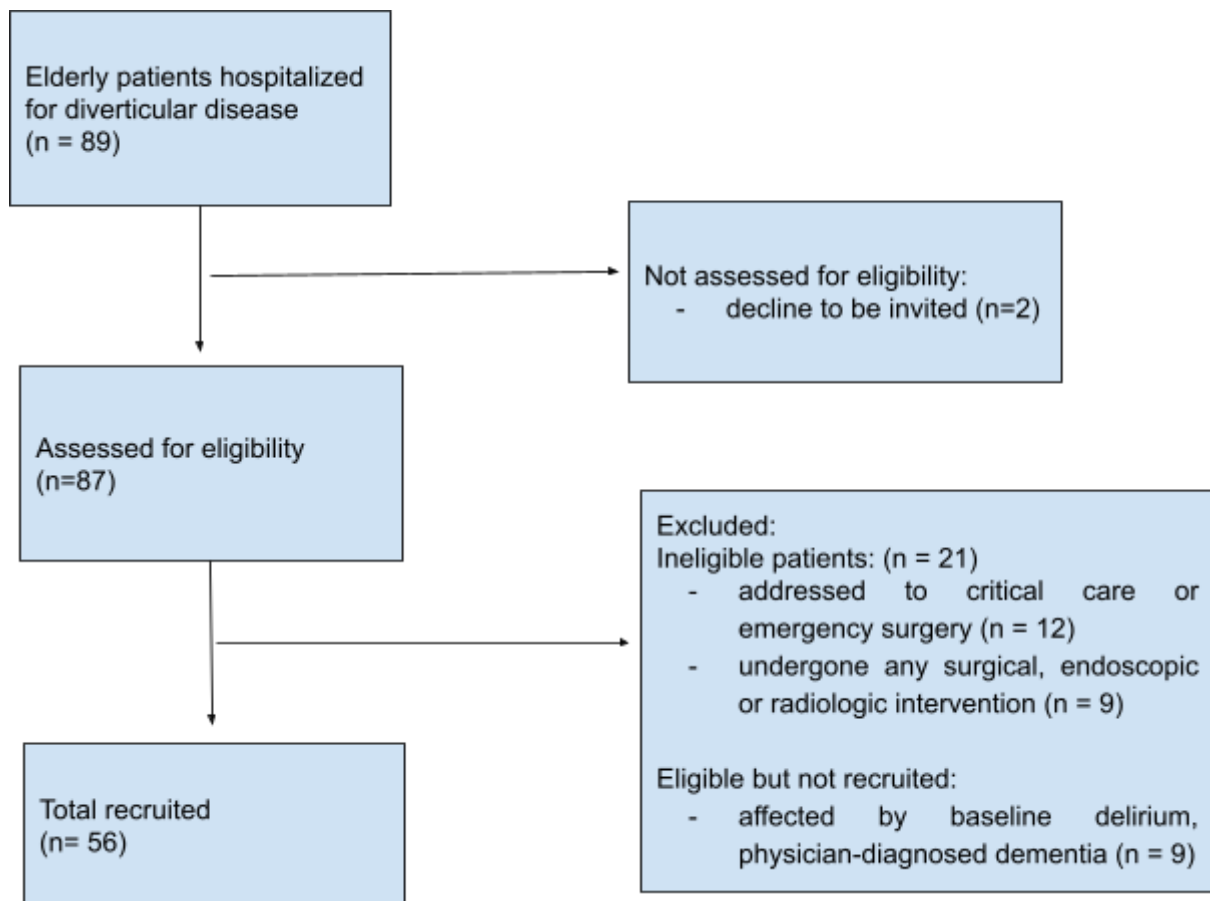

Supplement: s1 [file s1]
